# Supplementary material
Source: MDPI journal article supplement (https://www.mdpi.com/2077-0472/13/1/12)
Supplement: s1 [file s1]

**Table S1.** Individual effects of Nitrogen rates (a) and mulch types (b) on physiological parameters of cotton

| <b>a)</b>                           | 0 N kg ha <sup>-1</sup> | 70 N kg ha <sup>-1</sup> | 140 N kg ha <sup>-1</sup> | 210 N kg ha <sup>-1</sup> | <i>LSD</i> |
|-------------------------------------|-------------------------|--------------------------|---------------------------|---------------------------|------------|
| Chl contents (mg mL <sup>-1</sup> ) | 0.67 d                  | 1.38 c                   | 1.76 b                    | 2.10 a                    | 0.32       |
| Nitrogen (mg kg <sup>-1</sup> )     | 1.44 c                  | 2.77 b                   | 2.94 a                    | 3.05 a                    | 0.16       |
| Phosphorus (mg kg <sup>-1</sup> )   | 3.88 d                  | 4.45 c                   | 4.80 b                    | 4.96 a                    | 0.14       |
| Potassium (mg kg <sup>-1</sup> )    | 136.97 c                | 164.50 b                 | 182.20 a                  | 193.30 a                  | 14.10      |
| Calcium (mg kg <sup>-1</sup> )      | 12.26 d                 | 14.04 c                  | 14.39 b                   | 14.69 a                   | 0.26       |
| Magnesium (mg kg <sup>-1</sup> )    | 6.62 d                  | 7.41 c                   | 8.36 b                    | 8.72 a                    | 0.31       |

| <b>b)</b>                           | Control  | Chemical mulch | Natural Mulch | <i>LSD</i> |
|-------------------------------------|----------|----------------|---------------|------------|
| Chl contents (mg mL <sup>-1</sup> ) | 1.09 b   | 1.46 a         | 1.61 a        | 0.30       |
| Nitrogen (mg kg <sup>-1</sup> )     | 2.01 b   | 2.56 a         | 2.58 a        | 0.46       |
| Phosphorus (mg kg <sup>-1</sup> )   | 3.53 b   | 4.51 a         | 4.65 a        | 0.86       |
| Potassium (mg kg <sup>-1</sup> )    | 129.96 b | 169.68 a       | 175.60 a      | 29.88      |
| Calcium (mg kg <sup>-1</sup> )      | 11.04 b  | 13.86 a        | 13.88 a       | 1.33       |
| Magnesium (mg kg <sup>-1</sup> )    | 6.17 b   | 7.77 a         | 7.86 a        | 1.01       |

The treatment means with same letters are not statistically significant at 5% probability level.  
Chl= chlorophyll, LSD=least significant difference

**Table S2.** Individual effects of Nitrogen rates (a) and mulch types (b) on quality parameters of cotton

| <b>a)</b>                           | 0 N kg ha <sup>-1</sup> | 70 N kg ha <sup>-1</sup> | 140 N kg ha <sup>-1</sup> | 210 N kg ha <sup>-1</sup> | <i>LSD</i> |
|-------------------------------------|-------------------------|--------------------------|---------------------------|---------------------------|------------|
| GOT (%)                             | 29.90 d                 | 34.02 c                  | 37.53 b                   | 40.93 a                   | 2.18       |
| F length (mm)                       | 24.80 c                 | 29.06 b                  | 29.72 b                   | 30.93 a                   | 1.09       |
| F strength (g tex <sup>-1</sup> )   | 23.63 c                 | 24.77 c                  | 26.32 b                   | 29.40 a                   | 1.37       |
| F fineness (µg inch <sup>-1</sup> ) | 3.93 d                  | 4.32 c                   | 4.84 b                    | 5.10 a                    | 0.23       |
| F uniformity (%)                    | 45.12 d                 | 48.26 c                  | 51.48 b                   | 53.80 a                   | 2.05       |
| F elongation (%)                    | 10.22 d                 | 12.85 c                  | 13.13 b                   | 13.39 a                   | 0.23       |

| <b>b)</b>                           | Control | Chemical mulch | Natural Mulch | <i>LSD</i> |
|-------------------------------------|---------|----------------|---------------|------------|
| GOT (%)                             | 27.60 b | 35.77 a        | 36.52 a       | 1.69       |
| F length (mm)                       | 22.65 b | 28.52 a        | 29.05 a       | 2.38       |
| F strength (g tex <sup>-1</sup> )   | 20.30 b | 26.06 a        | 26.67 a       | 1.36       |
| F fineness (µg inch <sup>-1</sup> ) | 3.55 b  | 4.54 a         | 4.66 a        | 0.94       |
| F uniformity (%)                    | 39.34 b | 49.81 a        | 50.02 a       | 1.33       |
| F elongation (%)                    | 9.82 b  | 12.35 a        | 12.58 a       | 1.01       |

The treatment means with same letters are not statistically significant at 5% probability level.  
GOT=ginning out turn, F= fiber, LSD=least significant difference

**Table S3.** Individual effects of Nitrogen rates (a) and mulch types (b) on yield parameters of cotton

| <b>a)</b>                            | 0 N kg ha <sup>-1</sup> | 70 N kg ha <sup>-1</sup> | 140 N kg ha <sup>-1</sup> | 210 N kg ha <sup>-1</sup> | <i>LSD</i> |
|--------------------------------------|-------------------------|--------------------------|---------------------------|---------------------------|------------|
| Total yield (t ha <sup>-1</sup> )    | 4.73 d                  | 5.60 c                   | 6.77 b                    | 7.47 a                    | 0.58       |
| Biomass yield (t ha <sup>-1</sup> )  | 2.47 b                  | 2.73 b                   | 3.50 a                    | 3.63 a                    | 0.73       |
| Economic yield (t ha <sup>-1</sup> ) | 2.20 d                  | 2.87 c                   | 3.27 b                    | 3.83 a                    | 0.40       |
| Seed yield (t ha <sup>-1</sup> )     | 1.50 d                  | 1.90 bc                  | 2.13 b                    | 2.40 a                    | 0.25       |
| Lint yield (t ha <sup>-1</sup> )     | 0.69 d                  | 0.98 bc                  | 1.18 b                    | 1.43 a                    | 0.22       |

| <b>b)</b>                            | Control | Chemical mulch | Natural Mulch | <i>LSD</i> |
|--------------------------------------|---------|----------------|---------------|------------|
| Total yield (t ha <sup>-1</sup> )    | 4.76 b  | 6.15 a         | 6.33 a        | 1.03       |
| Biomass yield (t ha <sup>-1</sup> )  | 2.42 b  | 3.08 a         | 3.15 a        | 0.52       |
| Economic yield (t ha <sup>-1</sup> ) | 2.34 b  | 3.05 a         | 3.15 a        | 0.64       |
| Seed yield (t ha <sup>-1</sup> )     | 1.52 b  | 2.00 a         | 2.05 a        | 0.39       |
| Lint yield (t ha <sup>-1</sup> )     | 0.82 b  | 1.06 a         | 1.12 a        | 0.18       |

The treatment means with same letters are not statistically significant at 5% probability level.
